# Supplementary material
Source: PubMed Central journal article supplement (PMC2730192)

## SUPPLEMENTAL FIGURE LEGEND

**Fig 1.** Arginine mutations of the dimerization motif affect interaction and CYP17 reporter transcription. A, mammalian two hybrid interaction of GAL4.GCN5 and VP16.CtBP1 (WT or mutants) in H295R cells in the presence or absence of Bt<sub>2</sub>cAMP is shown +/- SEM. Symbols indicate significant difference from control (\*) or Bt<sub>2</sub>cAMP stimulated (‡) interaction with WT CtBP1. B, mammalian two hybrid SF-1:CtBP interaction with WT CtBP1 or mutants near the helical bend were measured. \*, differs significantly from basal SF-1: WT CtBP1 signal. C, CYP17 -300 reporter (125 ng) activity was measured in the presence of SF-1 (25 ng), and WT or mutant CtBP1 or homologous site mutants of CtBP2 (25 ng). Symbols indicate significant difference from basal (^) or Bt<sub>2</sub>cAMP-stimulated (‡)SF-1 induced reporter activity in the absence of overexpressed CtBP.

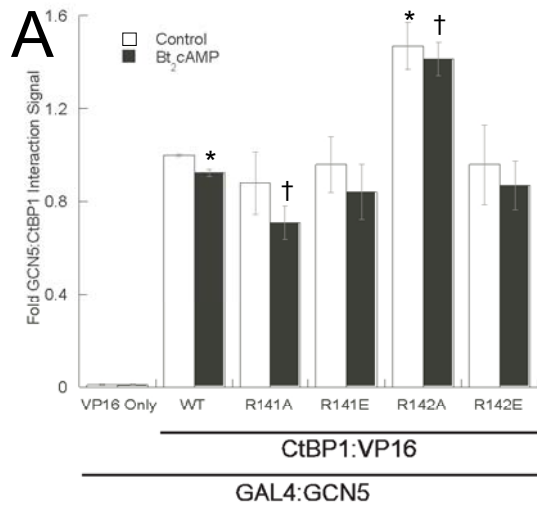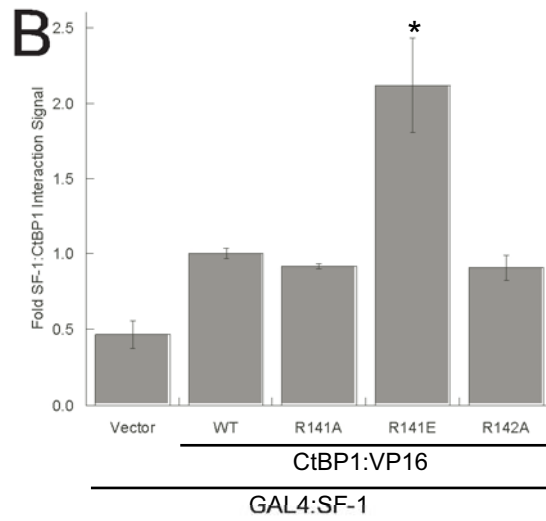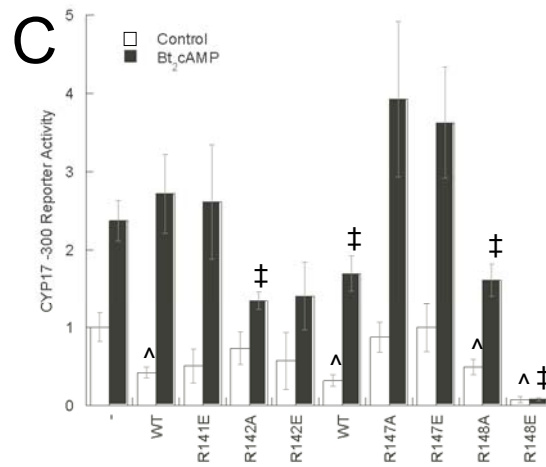

Supplement: NIHMS125924-supplement-supplementary_fig.pdf [file NIHMS125924-supplement-supplementary_fig.pdf]
